# Supplementary material
Source: publisher figshare collection journal article supplement (https://acs.figshare.com/ndownloader/files/4422433)
Supplement: Supplementary file 1 [file 4422433]

# Poly( $\gamma$ -glutamic acid) Hydrogels with Water-Sensitive Luminescence Derived from Aggregation-Induced Emission of *o*-Carborane

*Kenta Kokado, Atsushi Nagai, and Yoshiki Chujo \**

Department of Polymer Chemistry, Graduate School of Engineering, Kyoto University,

Katsura, Nishikyo-ku, Kyoto 615-8510, Japan

[chujo@chujo.synchem.kyoto-u.ac.jp](mailto:chujo@chujo.synchem.kyoto-u.ac.jp)

## Experimental section

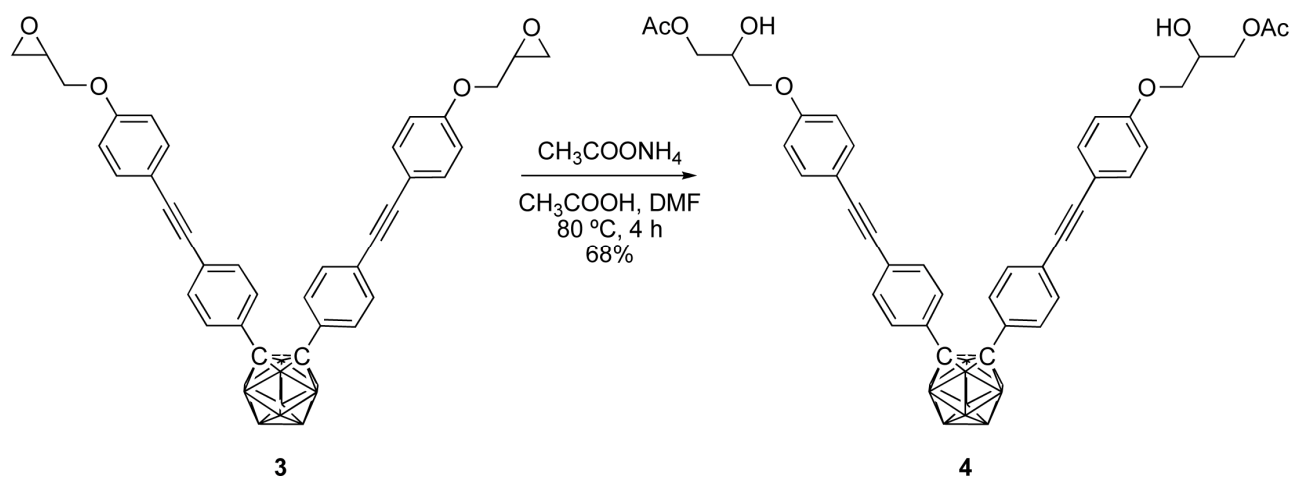

**Scheme S1.** Ring-opening reaction of **3**.

**Materials.** Unless stated otherwise, all other reagents were obtained from commercial sources and used without further purification.

**Measurements.**  $^1\text{H}$  (400 MHz),  $^{13}\text{C}$  (100 MHz) and  $^{11}\text{B}$  (128 MHz) NMR measurements were recorded on a JEOL JNM-EX400 instrument.  $^1\text{H}$  and  $^{13}\text{C}$  NMR spectra used 0.05% tetramethylsilane (TMS) as an internal standard and  $^{11}\text{B}$  NMR spectra were referenced externally to  $\text{BF}_3\cdot\text{Et}_2\text{O}$  at room temperature. UV-vis spectra were recorded on a Shimadzu UV-3600 spectrophotometer at room temperature. Fluorescence emission spectra and absolute quantum yield, measured by integrating sphere method, were recorded on a HORIBA JOBAN YVON Fluoromax-4 spectrofluorometer.

**Bis(4-(4-(1-acetoxy-2-hydroxy-propyl-3-oxy)-phenylethynyl)phenyl)-*o*-carborane (**4**).** A solution of ammonium acetate in acetic acid (4 M, 0.5 mL) was added to the solution of **3** (32 mg, 0.05 mmol) in DMF (0.5 mL), and the mixture was heated for 4 h. After cooling, the reaction mixture was diluted with  $\text{CHCl}_3$ , and washed with 5 wt%  $\text{K}_2\text{CO}_3$  aq. and brine. The solution was dried over  $\text{MgSO}_4$ , and the solvent was removed by rotary evaporator. The crude product was purified by column chromatography to give **4** as a colorless foam (25 mg, 68%).  $\delta$  (ppm) 7.42 (d, 4H,  $J = 8.77$  Hz), 7.39 (d, 8H,  $J = 8.53$  Hz), 7.27 (d, 4H,  $J = 8.53$  Hz), 6.87 (d, 4H,  $J = 8.77$  Hz), 4.33-4.21 (m, 6H), 4.08-3.99 (m, 4H), 3.69-1.77 (br, 10H), 2.56 (br, 2H)  $^{13}\text{C}$  NMR (100 MHz,  $\text{CDCl}_3$ ):  $\delta$  (ppm) 171.2, 158.6, 133.2, 131.2, 130.5, 129.9,

125.8, 115.2, 114.7, 92.0, 87.0, 84.9, 68.7, 68.5, 65.3, 20.8.  $^{11}\text{B}$  NMR (128 MHz,  $\text{CDCl}_3$ ):  $\delta$  (ppm) -2.8, -10.3. HRMS (FAB) Calcd for  $\text{C}_{40}\text{H}_{43}\text{B}_{10}\text{O}_8$   $[\text{M}-\text{H}]^+$ :  $m/z$  761.3888, Found:  $m/z$  761.3905.

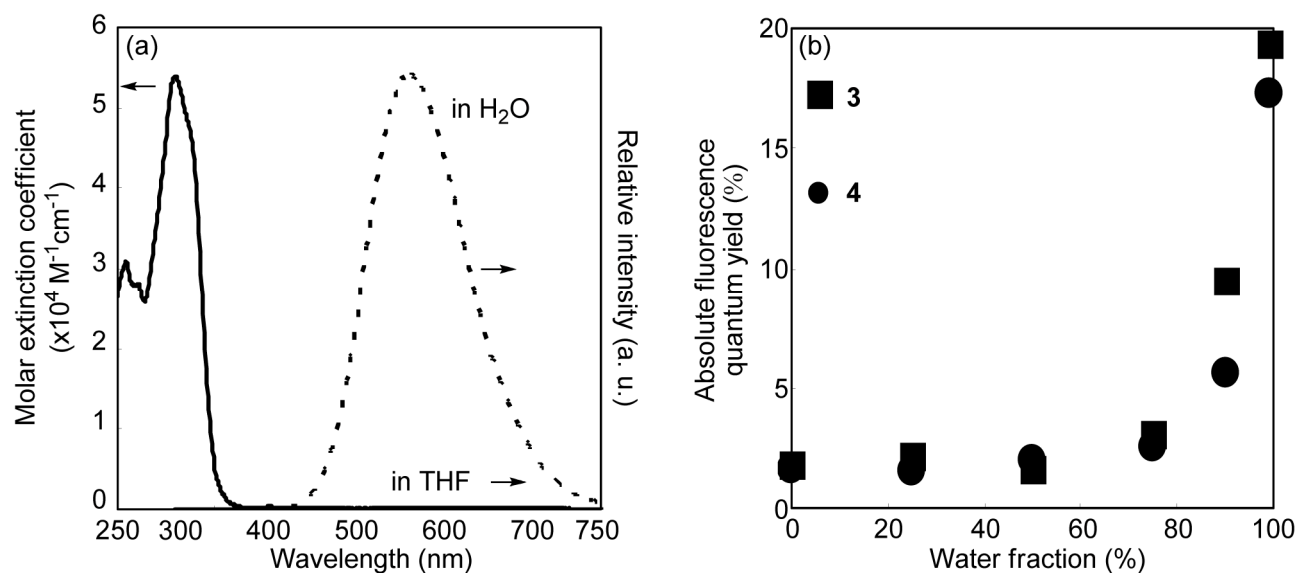

**Figure S1.** (a) UV-vis and fluorescence spectra of **4** in THF ( $1.0 \times 10^{-5}$  mol/L, solid line) and in the mixed solvent of THF/ $\text{H}_2\text{O}$  = 1/99 (v/v) ( $1.0 \times 10^{-5}$  mol/L, dashed line). (b) Dependence of quantum yields of **3** and **4** on solvent compositions of the THF/ $\text{H}_2\text{O}$  mixture.
